# Supplementary material for: Effect of electrode material and electrolysis process on the preparation of electrolyzed oxidizing water
Source: Royal Society of Chemistry journal article supplement (doi:10.1039/c8nj01076e), 2018-01-01
Supplement: c8nj01076e1.pdf [file c8nj01076e1.pdf]

Electronic Supplementary Material (ESI) for New Journal of Chemistry.

## Supporting information

### **Effect of electrode material and electrolysis process on the preparation of electrolyzed oxidizing water**

Ruoxi Ming, Yuchan Zhu, Li Deng, Ailian Zhang, Ju Wang, Yongqi Han, Bo Chai and Zhandong Ren\*

School of Chemical and Environmental Engineering, Wuhan Polytechnic University, Wuhan, 430023, P. R. China.

E-mail: renzhandong@163.com

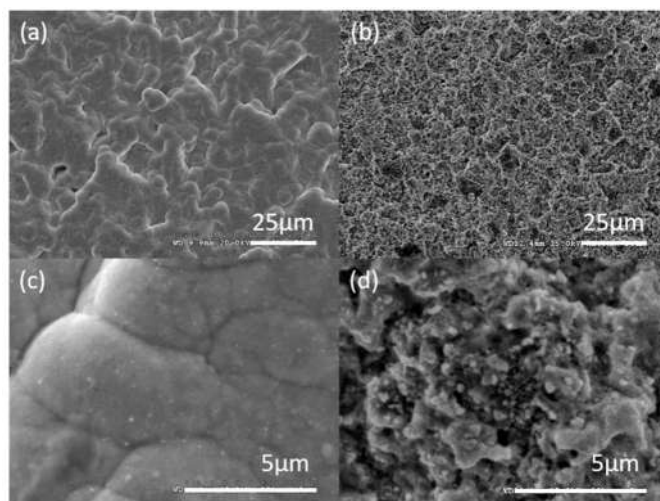

Fig. S1† SEM diagrams of Pt-EP (a, c) and Pt-TD (b, d) electrodes.

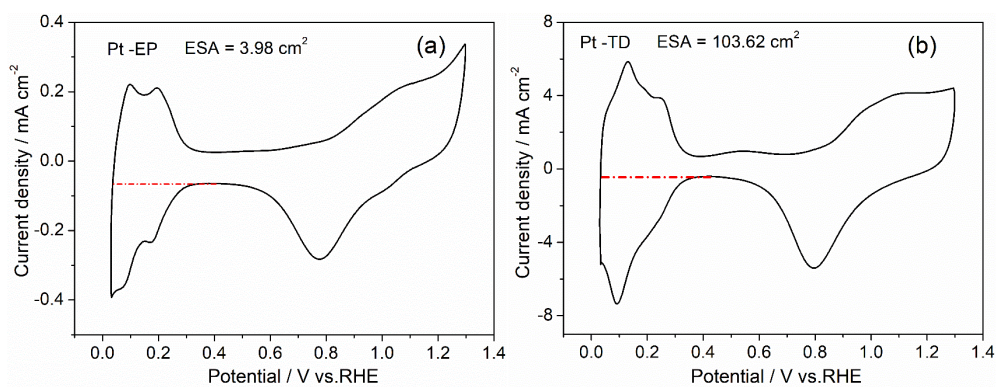

Fig. S2† Electrochemical active surface areas (ESAs) of Pt-EP(a) and Pt-TD(b) electrodes in  $0.5 \text{ mol L}^{-1} \text{ H}_2\text{SO}_4$ . ( $\text{ESA} = Q_{\text{H}} / 0.21$ .  $Q_{\text{H}}$  is the quantity of electric charge of the  $\text{H}_{\text{ad}}$  underpotential deposition.  $0.21 \text{ mC cm}^{-2}$  is the charge constant of  $\text{H}_{\text{ad}}$  underpotential deposition on the polycrystalline platinum.)

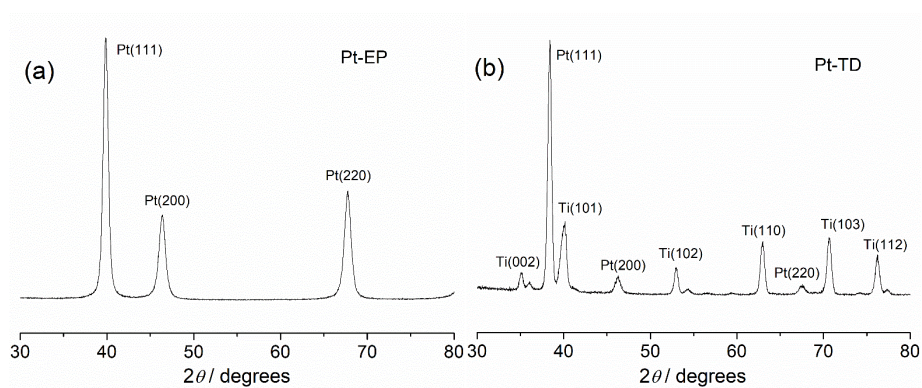

Fig. S3† XRD diagrams of Pt-EP (a) and Pt-TD (b) electrodes.

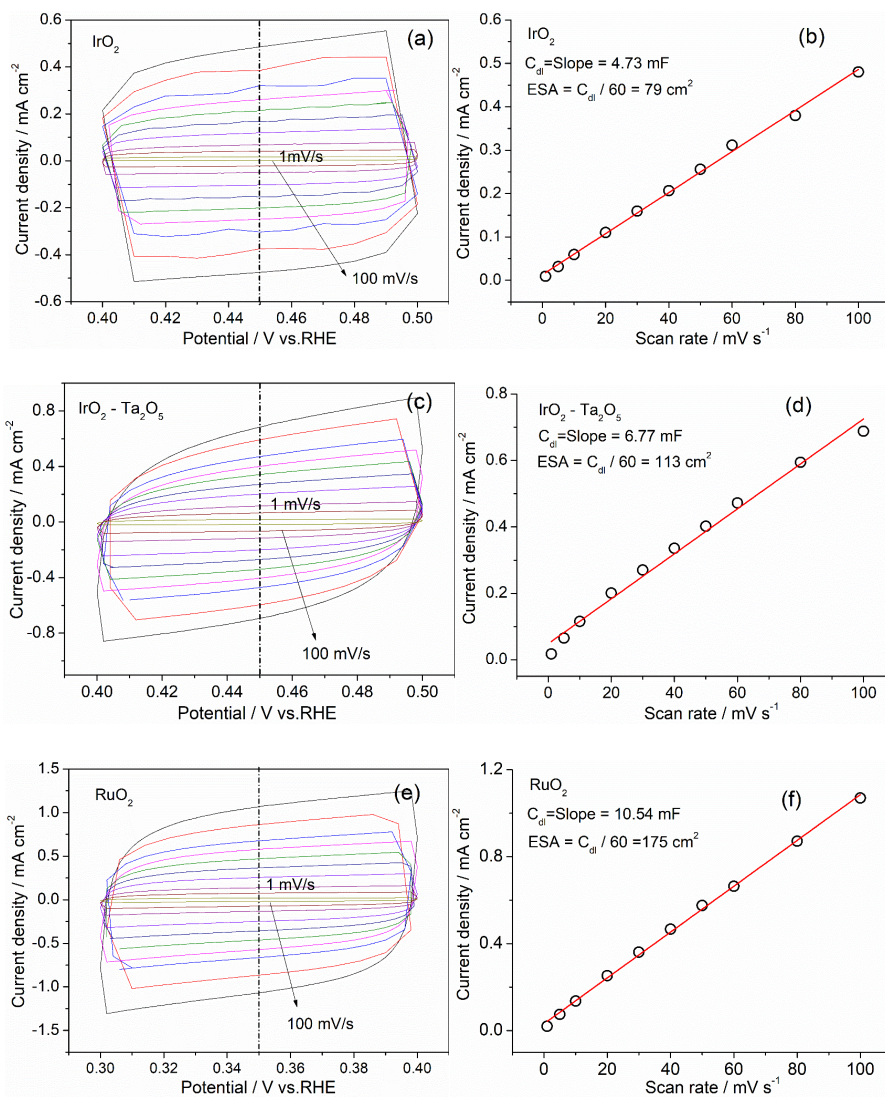

Fig. S4† Electrochemical active surface areas (ESAs) of  $\text{IrO}_2$ (a, b),  $\text{IrO}_2\text{-Ta}_2\text{O}_5$ (c, d) and  $\text{RuO}_2$ (e, f) electrodes in  $0.5 \text{ mol L}^{-1} \text{ H}_2\text{SO}_4$ . ( $\text{ESA} = C_{dl}/60$ .  $C_{dl}$  is the capacitance of oxide electrode and  $60 \mu\text{F cm}^{-2}$  is the capacitance constant of smooth oxide electrode.  $C_{dl} = i_c/v$ , which corresponds to the slope in Fig. S4† (b, d, f).  $i_c$  is the current density and  $v$  is scan rate (1, 5, 10, 20, 30, 40, 50, 60, 80, 100 mV/s))

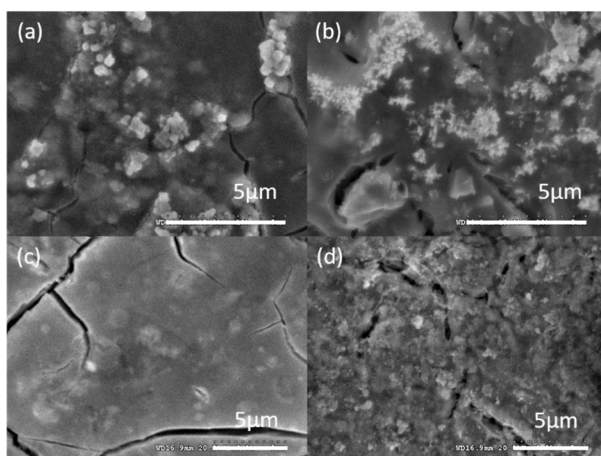

Fig. S5† SEM diagrams of  $\text{RuO}_2$  (a),  $\text{IrO}_2\text{-Ta}_2\text{O}_5$  (b),  $\text{IrO}_2$  (thermal decomposition temperatures  $400^\circ\text{C}$ , c) and  $\text{IrO}_2$  (thermal decomposition temperatures  $600^\circ\text{C}$ , d) electrodes.

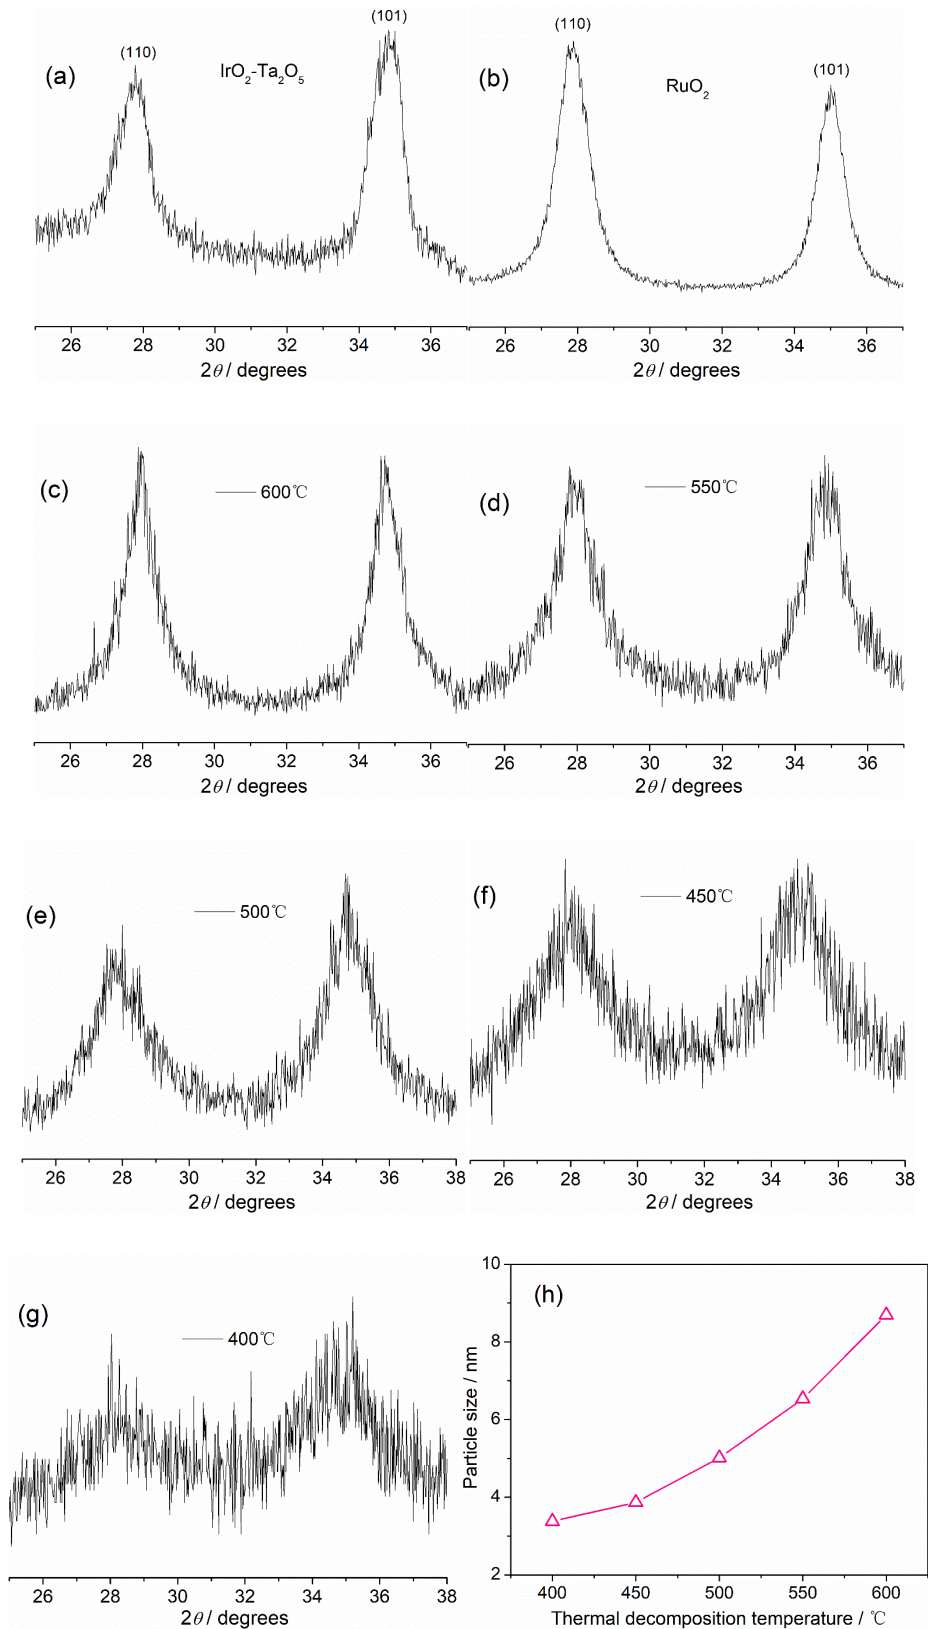

Fig. S6† XRD diagrams of  $\text{IrO}_2\text{-Ta}_2\text{O}_5$  (a) and  $\text{RuO}_2$  (b) electrodes. XRD diagrams of  $\text{IrO}_2$  electrodes at different thermal decomposition temperatures. (c)  $600^\circ\text{C}$ , (d)  $550^\circ\text{C}$ , (e)  $500^\circ\text{C}$ , (f)  $450^\circ\text{C}$ , (g)  $400^\circ\text{C}$ . The particle size of  $\text{IrO}_2$  electrodes of different thermal decomposition temperatures (h).

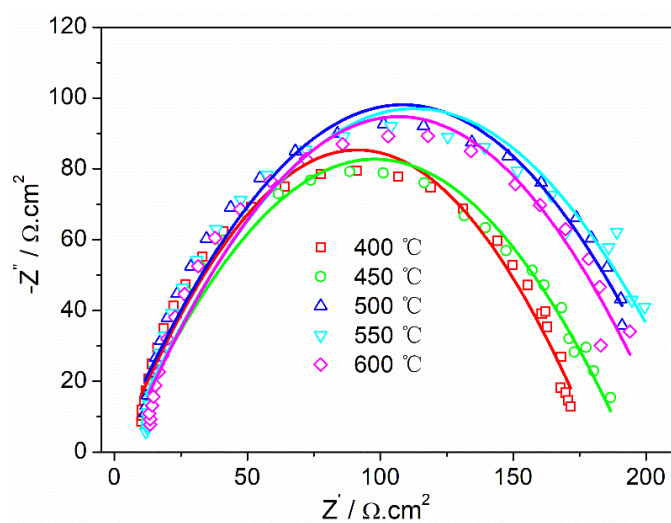

Fig. S7† Electrochemical impedance spectroscopy of IrO<sub>2</sub> electrodes at different thermal decomposition temperatures.

Table S1† The compositions of IrO<sub>2</sub>-Ta<sub>2</sub>O<sub>5</sub>, RuO<sub>2</sub>-SnO<sub>2</sub> and RuO<sub>2</sub>-TiO<sub>2</sub> by XRF

| Electrode                                        | Element                        | Atom%  | Std. dev. proc.-calc. | Line         | Int. (cps $\mu\text{A}^{-1}$ ) |
|--------------------------------------------------|--------------------------------|--------|-----------------------|--------------|--------------------------------|
| IrO <sub>2</sub> -Ta <sub>2</sub> O <sub>5</sub> | IrO <sub>2</sub>               | 75.305 | [0.370] Quan-FP       | IrL $\alpha$ | 71.1850                        |
|                                                  | Ta <sub>2</sub> O <sub>5</sub> | 24.695 | [0.169] Quan-FP       | TaL $\alpha$ | 42.3708                        |
| RuO <sub>2</sub> -SnO <sub>2</sub>               | RuO <sub>2</sub>               | 72.629 | [28.234] Quan-FP      | RuK $\alpha$ | 3.8226                         |
|                                                  | SnO <sub>2</sub>               | 27.371 | [71.766] Quan-FP      | SnK $\alpha$ | 0.2605                         |
| RuO <sub>2</sub> -TiO <sub>2</sub>               | RuO <sub>2</sub>               | 75.381 | [0.207] Quan-FP       | RuK $\alpha$ | 33.4685                        |
|                                                  | TiO <sub>2</sub>               | 24.619 | [0.089] Quan-FP       | TiK $\alpha$ | 24.4534                        |

Table S2† The values of pH and ORP of EO water prepared by different electrode materials

| Electrode material                                    | The physicochemical property of EOW |          |
|-------------------------------------------------------|-------------------------------------|----------|
|                                                       | pH                                  | ORP / mV |
| Pt-EP                                                 | 1.76                                | 1144     |
| Pt-TD-500                                             | 1.91                                | 1164     |
| RuO <sub>2</sub> -500                                 | 2.03                                | 1160     |
| IrO <sub>2</sub> -500                                 | 1.88                                | 1161     |
| IrO <sub>2</sub> -Ta <sub>2</sub> O <sub>5</sub> -500 | 1.89                                | 1144     |

Table S3† The values of pH and ORP of EO water prepared by IrO<sub>2</sub>-Ta<sub>2</sub>O<sub>5</sub> electrodes after continuous electrode polarity changes.

| Number | pH   | ORP/mV | Note |
|--------|------|--------|------|
| 1      | 2.65 | 1107   | ①    |
| 2      | 2.63 | 1106   | ②    |
| 3      | 2.65 | 1107   | ①    |
| 4      | 2.65 | 1105   | ②    |
| 5      | 2.65 | 1101   | ①    |
| 6      | 2.63 | 1109   | ②    |
| 7      | 2.66 | 1102   | ①    |
| 8      | 2.65 | 1093   | ②    |
| 9      | 2.66 | 1103   | ①    |
| 10     | 2.68 | 1115   | ②    |

① IrO<sub>2</sub>-Ta<sub>2</sub>O<sub>5</sub>-1 as anode, IrO<sub>2</sub>-Ta<sub>2</sub>O<sub>5</sub>-2 as cathode

② IrO<sub>2</sub>-Ta<sub>2</sub>O<sub>5</sub>-2 as anode, IrO<sub>2</sub>-Ta<sub>2</sub>O<sub>5</sub>-1 as cathode

Table S4† The preparation process parameters and physicochemical properties of EO water at different current density

| The preparation process parameters    |            |             | The physicochemical properties of EO water |          |                          |
|---------------------------------------|------------|-------------|--------------------------------------------|----------|--------------------------|
| Current density / mA cm <sup>-2</sup> | Time / min | Voltage / V | pH                                         | ORP / mV | ACC / mg L <sup>-1</sup> |
| 20                                    | 38         | 15          | 2.47                                       | 1163     | 59.31                    |
| 30                                    | 27         | 18          | 2.47                                       | 1166     | 60.00                    |
| 40                                    | 20         | 20          | 2.53                                       | 1163     | 56.37                    |
| 50                                    | 17         | 21          | 2.53                                       | 1163     | 57.70                    |
| 60                                    | 16         | 25          | 2.48                                       | 1165     | 70.21                    |
| 70                                    | 13         | 28          | 2.49                                       | 1161     | 60.85                    |

Table S5† The preparation process parameters and physicochemical properties of EO water at different electrolyte concentration

| The preparation process parameters            |            |             | The physicochemical properties of EO water |          |                          |
|-----------------------------------------------|------------|-------------|--------------------------------------------|----------|--------------------------|
| Electrolyte concentration / g L <sup>-1</sup> | Time / min | Voltage / V | pH                                         | ORP / mV | ACC / mg L <sup>-1</sup> |
| 0.3                                           | 35         | 26          | 2.73                                       | 1144     | 67.40                    |
| 0.4                                           | 25         | 22          | 2.6                                        | 1158     | 63.14                    |
| 0.5                                           | 20         | 20          | 2.58                                       | 1147     | 58.04                    |
| 0.6                                           | 18         | 19          | 2.52                                       | 1164     | 61.53                    |
| 0.7                                           | 15         | 18          | 2.54                                       | 1165     | 55.74                    |
| 0.8                                           | 12         | 18          | 2.53                                       | 1164     | 50.63                    |

Table S6† The values of pH at different rotational speeds

| Time / min | pH   |         |         |          |
|------------|------|---------|---------|----------|
|            | 0rpm | 450 rpm | 900 rpm | 1350 rpm |
| 0          | 2.21 | 2.30    | 2.05    | 2.05     |
| 10         | 1.92 | 2.17    | 2.21    | 1.99     |
| 20         | 2.14 | 1.96    | 1.99    | 2.01     |
| 30         | 2.17 | 2.15    | 2.02    | 2.13     |
| 40         | 2.09 | 2.09    | 2.17    | 2.29     |
| 50         | 2.08 | 2.18    | 2.24    | 2.00     |
| 60         | 1.86 | 2.11    | 2.00    | 1.98     |

Table S7† The values of ORP at different rotational speeds

| Time / min | ORP / mV |         |         |          |
|------------|----------|---------|---------|----------|
|            | 0rpm     | 450 rpm | 900 rpm | 1350 rpm |
| 0          | 1163     | 1149    | 1158    | 1158     |
| 10         | 1147     | 1142    | 1153    | 1133     |
| 20         | 1144     | 1139    | 1155    | 1128     |
| 30         | 1150     | 1137    | 1148    | 1123     |
| 40         | 1151     | 1134    | 1139    | 1123     |
| 50         | 1154     | 1134    | 1129    | 1101     |
| 60         | 1152     | 1124    | 1106    | 1057     |

Table S8† The values of pH at different temperature

| Time / min | pH   |      |      |      |
|------------|------|------|------|------|
|            | 30°C | 50°C | 60°C | 70°C |
| 0          | 1.89 | 1.98 | 1.98 | 1.86 |
| 10         | 2.04 | 1.92 | 1.85 | 1.95 |
| 20         | 1.89 | 1.84 | 1.92 | 1.89 |
| 30         | 1.95 | 1.90 | 1.82 | 1.99 |
| 40         | 1.92 | 1.90 | 1.90 | 1.92 |
| 50         | 2.05 | 1.89 | 1.94 | 1.84 |
| 60         | 1.98 | 1.93 | 1.93 | 1.86 |

Table S9† The values of ORP at different rotational speeds

| Time / min | ORP / mV |      |      |      |
|------------|----------|------|------|------|
|            | 30°C     | 50°C | 60°C | 70°C |
| 0          | 1159     | 1155 | 1157 | 1153 |
| 10         | 1156     | 1151 | 1155 | 1154 |
| 20         | 1155     | 1157 | 1152 | 1153 |
| 30         | 1152     | 1156 | 1151 | 1150 |
| 40         | 1150     | 1153 | 1151 | 1142 |
| 50         | 1150     | 1150 | 1141 | 1129 |
| 60         | 1145     | 1145 | 1135 | 1105 |
